# Supplementary material for: HPLC-PDA Combined with Chemometrics for Quantitation of Active Components and Quality Assessment of Raw and Processed Fruits of Xanthium strumarium L
Source: MDPI journal article supplement (doi:10.3390/molecules23020243), 2018-01-25
Supplement: s1 [file s1]

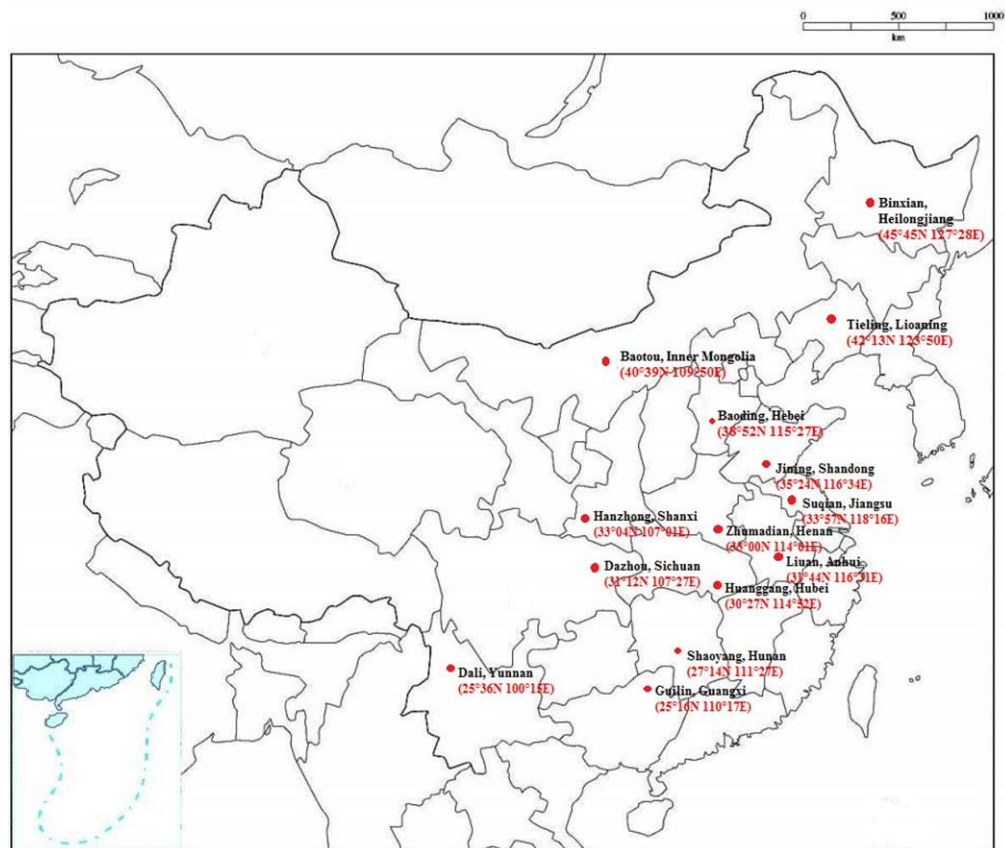

Figure S1. Map of region where the samples are collected (Red origin) in China.
